# Supplementary material for: Cyanoremediation of heavy metals (As( v ), Cd( ii ), Cr( vi ), Pb( ii )) by live cyanobacteria ( Anabaena variabilis , and Synechocystis sp.): an eco-sustainable technology
Source: Royal Society of Chemistry journal article supplement (doi:10.1039/d4ra00409d), 2024-01-01
Supplement: d4ra00409d1.pdf [file d4ra00409d1.pdf]

## Supplementary materials for:

### Cyanoremediation of Heavy Metals (As (V), Cd (II), Cr (VI), Pb (II)) by Live Cyanobacteria (*Anabaena variabilis*, and *Synechocystis* sp.): An Eco-Sustainable Technology

Hossain Md Sabbir, Tatsufumi Okino\*

Email address of the corresponding author: [okino@ees.hokudai.ac.jp](mailto:okino@ees.hokudai.ac.jp)

#### Supporting information:

- Tables S1-S3
- Figures: S1-S8

**Table S1. Experimental design of this study.**

| Experiments                                                    | Experimental conditions                                                                                          |                            |
|----------------------------------------------------------------|------------------------------------------------------------------------------------------------------------------|----------------------------|
| Effects of HMs on cyanobacterial growth and pigment production | HMs concentration:                                                                                               |                            |
|                                                                | <i>Synechocystis</i> sp.                                                                                         | <i>Anabaena variabilis</i> |
|                                                                | Cd: 1 mg L <sup>-1</sup>                                                                                         | Cd: 1 mg L <sup>-1</sup>   |
|                                                                | As: 1 mg L <sup>-1</sup>                                                                                         | As: 4 mg L <sup>-1</sup>   |
|                                                                | Pb: 4 mg L <sup>-1</sup>                                                                                         | Pb: 1 mg L <sup>-1</sup>   |
|                                                                | Cr: 2 mg L <sup>-1</sup>                                                                                         | Cr: 1 mg L <sup>-1</sup>   |
|                                                                | pH: 7.5                                                                                                          | pH: 8.0                    |
|                                                                | Culture time: 12 days                                                                                            | Culture time: 14 days      |
| Analysis of surface morphology change                          | Scanning electron microscope (SEM),<br>Fourier transform infrared spectrometry (FT-IR): lyophilized cell sample. |                            |
|                                                                | HMs concentration:                                                                                               |                            |
|                                                                | <i>Synechocystis</i> sp.                                                                                         | <i>Anabaena variabilis</i> |
|                                                                | Cd: 1 mg L <sup>-1</sup>                                                                                         | Cd: 1 mg L <sup>-1</sup>   |
|                                                                | As: 1 mg L <sup>-1</sup>                                                                                         | As: 4 mg L <sup>-1</sup>   |
|                                                                | Pb: 4 mg L <sup>-1</sup>                                                                                         | Pb: 1 mg L <sup>-1</sup>   |
| Cr: 2 mg L <sup>-1</sup>                                       | Cr: 1 mg L <sup>-1</sup>                                                                                         |                            |
|                                                                | pH: 7.5                                                                                                          | pH: 8.0                    |

|                                           |                          |                            |
|-------------------------------------------|--------------------------|----------------------------|
|                                           | Culture time: 48 h       | Culture time: 48 h         |
| Surface negativity change: Zeta potential | HMs concentration:       |                            |
|                                           | <i>Synechocystis</i> sp. | <i>Anabaena variabilis</i> |
|                                           | Cd: 1 mg L <sup>-1</sup> | Cd: 1 mg L <sup>-1</sup>   |
|                                           | As: 1 mg L <sup>-1</sup> | As: 4 mg L <sup>-1</sup>   |
|                                           | Pb: 4 mg L <sup>-1</sup> | Pb: 1 mg L <sup>-1</sup>   |
|                                           | Cr: 2 mg L <sup>-1</sup> | Cr: 1 mg L <sup>-1</sup>   |
|                                           | pH: 7.5                  | pH: 8.0                    |
|                                           | Culture time: 48 h       | Culture time: 48 h         |
|                                           |                          |                            |

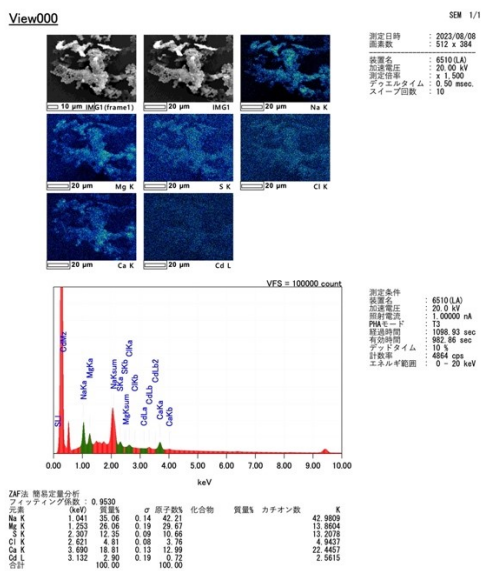

Figure S1. EDS mapping of *Synechocystis* sp. (NIES-3758) under Cd contamination.

View000

SEM 1/1

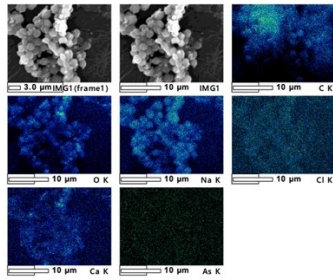

測定日時 : 2023/09/21  
 画素数 : 512 x 384  
 装置名 : 6510(LA)  
 加速電圧 : 20.00 kV  
 測定倍率 : x 5,000  
 ドライブタイム : 0.50 msec.  
 スweep回数 : 10

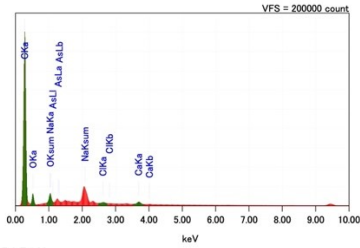

測定条件 : 6510(LA)  
 装置名 : 20.0 kV  
 加速電圧 : 1.00000 nA  
 照射電流 : 13  
 PHAモード : 1014.95 sec  
 測定時間 : 982.91 sec  
 ドライブタイム : 3  
 計数率 : 3570 cps  
 エネルギー範囲 : 0 - 20 keV

ZAF法 簡易定量分析  
 フィッティング係数 : 0.1099

| 元素   | (ppm)  | 質量%    | σ    | 原子%    | 化合物 | 質量% | カチオン数 | K       |
|------|--------|--------|------|--------|-----|-----|-------|---------|
| C K  | 0.277  | 77.16  | 0.03 | 82.43  |     |     |       | 86.9122 |
| O K  | 0.525  | 20.10  | 0.06 | 18.08  |     |     |       | 10.0096 |
| Na K | 1.041  | 1.74   | 0.01 | 0.97   |     |     |       | 1.8850  |
| Cl K | 2.621  | 0.12   | 0.00 | 0.05   |     |     |       | 0.2228  |
| Ca K | 3.890  | 0.39   | 0.00 | 0.16   |     |     |       | 0.8151  |
| As K | 10.530 | 0.48   | 0.02 | 0.31   |     |     |       | 0.0953  |
| 合計   |        | 100.00 |      | 100.00 |     |     |       |         |

Figure S2. EDS mapping of *Synechocystis* sp. (NIES-3758) under As contamination.

View001

SEM 1/1

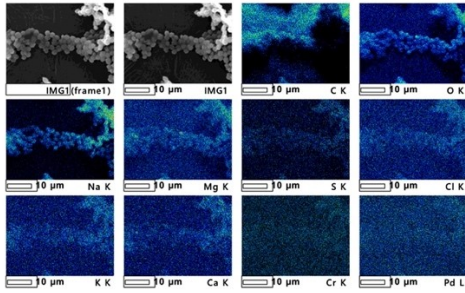

測定日時 : 2023/08/22  
 画像数 : 512 x 384  
 装置名 : 6510 (LA)  
 加速電圧 : 20.00 kV  
 測定倍率 : x 3,000  
 デウエルタイム : 0.50 msec.  
 スイープ回数 : 10

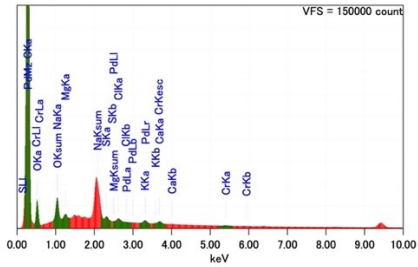

測定条件 : 6510 (LA)  
 装置名 : 20.0 kV  
 加速電圧 : 1.00000 nA  
 照射電流 : 13  
 PHAモード : T3  
 経過時間 : 1124.57 sec  
 有効時間 : 982.81 sec  
 テットタイム : 12 s  
 計数率 : 5515 cps  
 エネルギー範囲 : 0 - 20 keV

ZAF法 簡易定量分析  
 フィッティング係数 : 0.1389

| 元素   | (keV) | 質量%    | $\sigma$ | 原子数%   | 化合物 | 質量% | カチオン数 | K       |
|------|-------|--------|----------|--------|-----|-----|-------|---------|
| C K  | 0.277 | 79.15  | 0.03     | 84.21  |     |     |       | 87.6615 |
| O K  | 0.525 | 18.11  | 0.05     | 14.23  |     |     |       | 8.8298  |
| Na K | 1.041 | 1.35   | 0.01     | 0.88   |     |     |       | 1.7658  |
| Mg K | 1.253 | 0.26   | 0.00     | 0.13   |     |     |       | 0.2505  |
| S K  | 2.307 | 0.32   | 0.00     | 0.13   |     |     |       | 0.5427  |
| Cl K | 2.621 | 0.16   | 0.00     | 0.08   |     |     |       | 0.2731  |
| K K  | 3.312 | 0.14   | 0.00     | 0.05   |     |     |       | 0.2095  |
| Ca K | 2.690 | 0.21   | 0.00     | 0.07   |     |     |       | 0.3550  |
| Cr K | 5.411 | 0.08   | 0.00     | 0.02   |     |     |       | 0.1110  |
| Pd L | 2.838 | 0.23   | 0.01     | 0.23   |     |     |       | 0.0010  |
| 合計   |       | 100.00 |          | 100.00 |     |     |       |         |

JED-2300 AnalysisStation

JEOL

Figure S3. EDS mapping of *Synechocystis* sp. (NIES-3758) under Pb contamination.

View000

xps1ab1 1/1

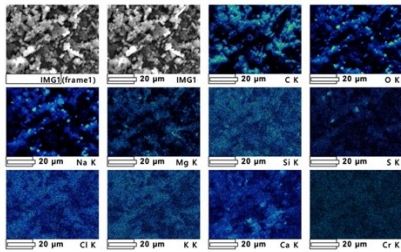

測定日時 : 2023/08/09  
 測高数 : 512 x 384  
 検量器 : 6510 (LA)  
 加速電圧 : 50.00 kV  
 測定倍率 : x 2,000  
 デアキュムタイム : 0.50 sec.  
 スープ回数 : 10

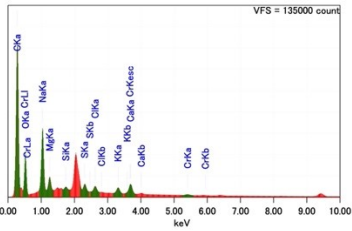

測定条件 : 6510 (LA)  
 検量器 : 20.0 kV  
 加速電圧 : 1.00000 nA  
 照射電流 : 13  
 経過時間 : 1072.01 sec  
 有効時間 : 862.81 sec  
 デアキュムタイム : 8.5  
 計数率 : 4376 cps  
 エネルギー範囲 : 0 ~ 20 keV

ZAF法 簡易定量分析  
 フィッティング係数 : 0.1510

| 元素   | (keV) | 質量%    | $\sigma$ | 原子数%   | 化合物 | 質量% | カチオン数 | K       |
|------|-------|--------|----------|--------|-----|-----|-------|---------|
| C K  | 0.277 | 57.40  | 0.03     | 98.98  |     |     |       | 54.8193 |
| O K  | 0.525 | 31.12  | 0.06     | 27.14  |     |     |       | 27.5714 |
| Na K | 1.041 | 6.87   | 0.01     | 4.17   |     |     |       | 9.5376  |
| Mg K | 1.253 | 1.30   | 0.01     | 0.75   |     |     |       | 1.4350  |
| Si K | 1.739 | 0.24   | 0.00     | 0.12   |     |     |       | 0.3990  |
| S K  | 2.307 | 0.75   | 0.00     | 0.33   |     |     |       | 1.5964  |
| Cl K | 2.621 | 0.50   | 0.00     | 0.20   |     |     |       | 1.0583  |
| K K  | 3.312 | 0.43   | 0.00     | 0.15   |     |     |       | 0.8270  |
| Ca K | 3.690 | 1.18   | 0.01     | 0.41   |     |     |       | 2.5799  |
| Cr K | 5.411 | 0.21   | 0.00     | 0.06   |     |     |       | 0.3771  |
| 合計   |       | 100.00 |          | 100.00 |     |     |       |         |

Figure S4. EDS mapping of *Synechocystis* sp. (NIES-3758) under Cr contamination.

View002

SEM 1/1

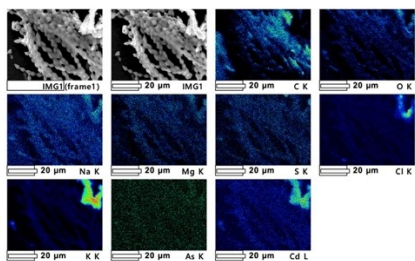

測定日時 : 2023/08/22  
 画素数 : 512 x 384  
 装置名 : 6510(LA)  
 加速電圧 : 20.00 kV  
 測定倍率 : x 2,000  
 デジタルタイム : 0.50 msec.  
 スリーブ回数 : 10

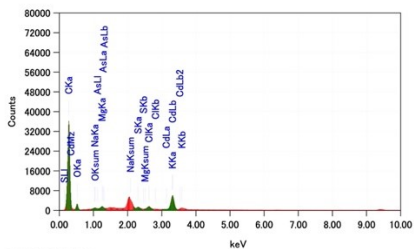

測定条件 : 6510(LA)  
 装置名 : 6510(LA)  
 加速電圧 : 20.0 kV  
 照射電流 : 1.00000 nA  
 PMモード : 13  
 経過時間 : 164.12 sec  
 有効時間 : 144.06 sec  
 ガットタイム : 12 µs  
 計数率 : 5584 cps  
 エネルギー範囲 : 0 - 20 keV

ZAF法 簡易定量分析  
 フィッティング係数 : 0.1310

| 元素   | (keV)  | 質量%    | σ    | 原子数%   | 化合物 | 質量% | カチオン数 | K       |
|------|--------|--------|------|--------|-----|-----|-------|---------|
| C K  | 0.277  | 75.24  | 0.07 | 82.03  |     |     |       | 81.7890 |
| O K  | 0.525  | 19.69  | 0.14 | 16.04  |     |     |       | 10.1353 |
| Na K | 1.041  | 0.28   | 0.01 | 0.16   |     |     |       | 0.3266  |
| Mg K | 1.253  | 0.39   | 0.01 | 0.27   |     |     |       | 0.3253  |
| S K  | 2.307  | 0.49   | 0.01 | 0.20   |     |     |       | 0.8972  |
| Cl K | 2.621  | 0.62   | 0.01 | 0.23   |     |     |       | 1.1250  |
| K K  | 3.912  | 2.39   | 0.02 | 0.64   |     |     |       | 5.0831  |
| As K | 10.530 | 0.10   | 0.04 | 0.02   |     |     |       | 0.1185  |
| Cd L |        | 0.38   |      | 0.42   |     |     |       |         |
| 合計   |        | 100.00 |      | 100.00 |     |     |       |         |

Figure S5. EDS mapping of *Anabaena variabilis* (NIES-2095) under Cd contamination.

View000

SEM 1/1

測定日時 : 2023/08/22  
画素数 : 512 x 384

装置名 : 6510 (LA)  
加速電圧 : 20.00 kV  
測定倍率 : x 1,500  
デューティタイム : 0.50 msec.  
スイープ回数 : 10

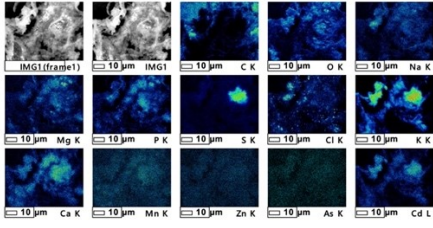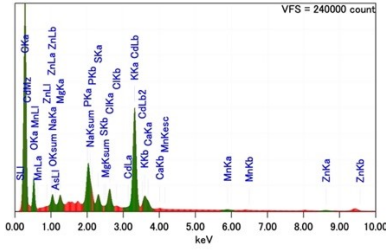

測定条件 : 6510 (LA)  
装置名 : 6510 (LA)  
加速電圧 : 20.0 kV  
測定電流 : 1.00000 nA  
PHモード : T3  
検出器 : 1110.61 sec  
有効時間 : 882.65 sec  
デットタイム : 11 μs  
計数率 : 6383 cps  
エネルギー範囲 : 0 - 20 keV

| 元素 | Count  | 質量%    | 原子%    | 化合物 | 質量% | カチオン数 | K       |
|----|--------|--------|--------|-----|-----|-------|---------|
| C  | 0.277  | 64.19  | 0.02   |     |     |       | 61.0529 |
| O  | 0.525  | 23.69  | 0.04   |     |     |       | 16.1444 |
| Na | 1.041  | 0.76   | 0.00   |     |     |       | 1.1715  |
| Mg | 1.253  | 0.50   | 0.00   |     |     |       | 0.7293  |
| P  | 2.013  | 1.63   | 0.00   |     |     |       | 9.5342  |
| S  | 2.307  | 0.74   | 0.00   |     |     |       | 1.7369  |
| Cl | 2.621  | 1.13   | 0.00   |     |     |       | 2.4143  |
| K  | 3.312  | 5.98   | 0.01   |     |     |       | 11.2397 |
| Ca | 3.690  | 0.62   | 0.00   |     |     |       | 1.3064  |
| Mn | 5.894  | 0.14   | 0.00   |     |     |       | 0.2359  |
| Zn | 8.630  | 0.18   | 0.00   |     |     |       | 0.2988  |
| As | 10.530 | 0.35   | 0.01   |     |     |       | 0.1356  |
| Cd | ND     | ND     | ND     |     |     |       | ND      |
| 合計 |        | 100.00 | 100.00 |     |     |       |         |

Figure S6. EDS mapping of *Anabaena variabilis* (NIES-2095) under As contamination.

View000

SEM 1/1

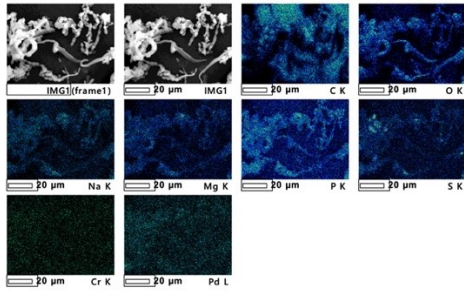

測定日時 : 2023/08/29  
 画素数 : 512 x 384  
 装置名 : 6510 (LA)  
 加速電圧 : 20.00 kV  
 測定倍率 : x 1,500  
 デュエルタイム : 0.50 msec.  
 スイープ回数 : 10

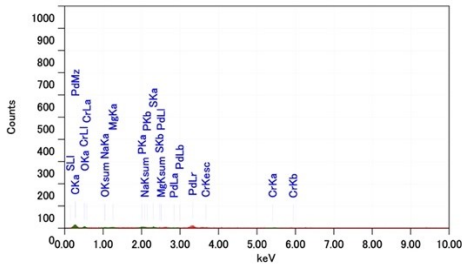

測定条件 : 6510 (LA)  
 装置名 : 20.0 kV  
 加速電圧 : 1.00000 nA  
 照射電流 : 13  
 PHAモード : 1020.97 sec  
 経過時間 : 982.89 sec  
 有効時間 : 3 %  
 デットタイム : 1835 cps  
 計数率 : 0 - 20 keV

ZAF法 簡易定量分析  
 フィットリング係数 : 0.7608

| 元素   | (keV) | 質量%    | $\sigma$ | 原子数%   | 化合物 | 質量% | カチオン数 | K       |
|------|-------|--------|----------|--------|-----|-----|-------|---------|
| C K  | 0.277 | 52.27  | 3.14     | 61.72  |     |     |       | 42,3377 |
| O K  | 0.525 | 35.24  | 6.62     | 33.90  |     |     |       | 39,7006 |
| Na K | 1.041 | 1.55   | 1.08     | 0.95   |     |     |       | 2,1023  |
| Mg K | 1.253 | 1.35   | 0.94     | 0.79   |     |     |       | 1,6532  |
| P K  | 2.013 | 1.74   | 0.80     | 0.79   |     |     |       | 3,8924  |
| S K  | 2.307 | 3.32   | 0.74     | 1.47   |     |     |       | 7,4331  |
| Cr K | 5.411 | 1.25   | 1.29     | 0.34   |     |     |       | 2,3424  |
| Pd L | 2.838 | 0.30   | 1.50     | 0.34   |     |     |       | 0,5382  |
| 合計   |       | 100.00 |          | 100.00 |     |     |       |         |

Figure S7. EDS mapping of *Anabaena variabilis* (NIES-2095) under Pb contamination.



View002

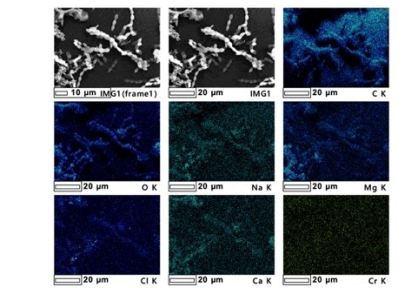

SEM 1/1  
 測定日時 : 2023/08/29  
 画素数 : 512 x 384  
 装置名 : 6510(LA)  
 加速電圧 : 20.00 kV  
 測定倍率 : x 1,500  
 デラエルトタイム : 0.50 msec.  
 スイープ回数 : 10

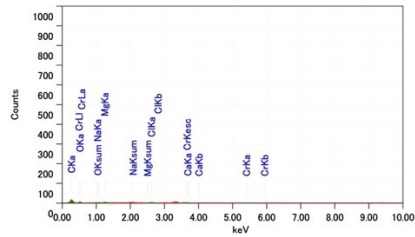

測定条件 : 6510(LA)  
 装置名 : 6510(LA)  
 加速電圧 : 20.0 kV  
 照射電流 : 1.00000 nA  
 PNAモード : 13  
 経過時間 : 1053.11 sec  
 有効時間 : 983.03 sec  
 デットタイム : 6 %  
 計数率 : 1555 cps  
 エネルギ範囲 : 0 - 20 keV

ZAF法 簡易定量分析  
 フィッティング係数 : 0.7293

| 元素   | (keV) | 質量%    | σ    | 原子数%   | 化合物 | 質量% | カチオン数 | K       |
|------|-------|--------|------|--------|-----|-----|-------|---------|
| O K  | 0.277 | 58.82  | 3.01 | 67.11  |     |     |       | 58.1020 |
| Cl K | 0.505 | 34.82  | 7.16 | 28.89  |     |     |       | 31.3462 |
| Na K |       | ND     |      | ND     |     |     |       |         |
| Mg K | 1.253 | 3.49   | 1.09 | 1.97   |     |     |       | 4.3867  |
| Cl K | 2.821 | 1.64   | 0.89 | 0.74   |     |     |       | 4.2383  |
| Cr K | 3.690 | 0.89   | 0.91 | 0.24   |     |     |       | 1.7828  |
| 合計   |       | 100.00 |      | 100.00 |     |     |       |         |

JED-2300 AnalysisStation

JEOL

Figure S8. EDS mapping of *Anabaena variabilis* (NIES-2095) under Cr contamination.

Table S2. Zeta potential of *Anabaena variabilis*

| Heavy metals | Excperiment-1 (mV) | Experiment-2 (mV) | Experiment-3 (mV) | Mean (mV) | Standard deviation |
|--------------|--------------------|-------------------|-------------------|-----------|--------------------|
| Control      | -29.31             | -29.51            | -31.99            | -30.27    | 1.49               |
| Pb           | -17.97             | -19.22            | -20.50            | -19.23    | 1.27               |
| As           | -15.60             | -15.90            | -18.75            | -16.75    | 1.74               |
| Cr           | -11.07             | -16.55            | -14.17            | -13.93    | 2.75               |
| Cd           | -13.35             | -11.99            | -12.56            | -12.63    | 0.68               |

Table S3. Zeta potential of *Synechocystis* sp.

| Heavy metals | Excperiment-1 (mV) | Experiment-2 (mV) | Experiment-3 (mV) | Mean (mV) | Standard deviation |
|--------------|--------------------|-------------------|-------------------|-----------|--------------------|
| Control      | -31.67             | -28.79            | -31.57            | -31.57    | 1.63               |
| Cr           | -15.04             | -16.91            | -17.90            | -16.91    | 1.45               |
| As           | -20.58             | -18.03            | -12.21            | -18.03    | 4.29               |
| Pb           | -19.47             | -22.30            | -21.56            | -21.56    | 1.47               |
| Cd           | -21.13             | -24.35            | -25.38            | -24.35    | 2.21               |
